# Supplementary material for: Incidence of non-typhoidal Salmonella invasive disease: A systematic review and meta-analysis
Source: PubMed Central journal article supplement (PMC8627500; doi:10.1016/j.jinf.2021.06.029), 2021-07-11
Supplement: NIHMS1747329-supplement-Suppl_Appendix_B.pdf [file NIHMS1747329-supplement-Suppl_Appendix_B.pdf]

# iNTS incidence systematic review data abstraction

\* Required

1. Name of reviewer \*

*Mark only one oval.*

Christian Marchello

Elena Pettini

Fabio Fiorino

John Crump

2. First author's last name \*

---

3. Publication year \*

---

4. PubMed ID \*

---

## Study characteristics

5. Study country \*

---

6. Study locality (city, district, or province) \*

---

## 7. UN region \*

<https://unstats.un.org/unsd/methodology/m49/>

Mark only one oval.

- Africa Skip to question 14
- Americas Skip to question 15
- Asia Skip to question 16
- Europe Skip to question 17
- Oceania Skip to question 18

## Study characteristics

## 8. Study design \*

Mark only one oval.

- Active surveillance, population-based without multipliers
- Active surveillance, population-based with multiplier
- Active surveillance, household-based without multipliers
- Active surveillance, household-based with multipliers
- Passive surveillance with catchment information (minimum incidence)
- Prospective observational
- Vaccine trial control arms
- Other: \_\_\_\_\_

## 9. Date data collection began \*

If no specific day provided, use the first of the month; if only a year is provided, enter 1 January

\_\_\_\_\_  
Example: January 7, 2019

## 10. Date data collection ended \*

If no specific day provided, use the last day of the month; if only a year is provided, enter 31 December

\_\_\_\_\_  
Example: January 7, 2019

## 11. Normally sterile site cultured \*

*Check all that apply.*

Blood

Bone marrow

CSF

Abscess

Other:  \_\_\_\_\_

## 12. Definition for culture request \*

(e.g. fever >3 days)

---

---

---

---

---

## 13. Inclusion age group \*

Based on inclusion criteria or age range data provided in results

*Mark only one oval.*

Children only (<=15y)

Adults only (>15y)

Mixed ages

*Skip to question 19*

**Africa sub-regions**

14.

*Mark only one oval.*

- Eastern Africa
- Middle Africa
- Northern Africa
- Southern Africa
- Western Africa

*Skip to question 8***Americas sub-regions**

15.

*Mark only one oval.*

- Caribbean
- Central America
- Northern America
- South America

*Skip to question 8***Asia sub-regions**

16.

*Mark only one oval.*

- Central Asia
- Eastern Asia
- South-eastern Asia
- Southern Asia
- Western Asia

*Skip to question 8***Europe sub-regions**

17. *Mark only one oval.*

- Eastern Europe
- Northern Europe
- Southern Europe
- Western Europe

*Skip to question 8*

### Oceania sub-regions

18. *Mark only one oval.*

- Australia and New Zealand
- Melanesia
- Micronesia
- Polynesia

*Skip to question 8*

### Incidence data

19. Year that surveillance started \*

---

20. Duration of surveillance (in months) \*

---

21. Population under surveillance

Denominator of incidence calculation; 'Not provided' if only person-time is given

---

## 22. Person-time observed

N/A if not provided or applicable

---

## 23. Which NTS serovar is data available? \*

*Mark only one oval.*

- NTS only (does not stratify by serovar) *Skip to question 24*
- Salmonella Typhimurium *Skip to question 25*
- Salmonella Enteritidis *Skip to question 26*
- Salmonella Heidelberg *Skip to question 27*
- Salmonella Dublin *Skip to question 28*
- Salmonella Newport *Skip to question 29*
- Salmonella Choleraesuis *Skip to question 30*
- Other *Skip to question 31*

**Incidence data**

## 24. Cases of NTS only (does not stratify by serovar)

Number cultured from normally sterile sites

---

*Skip to question 32*

**Incidence data**

## 25. Cases of Salmonella Typhimurium

Number cultured from normally sterile sites

---

*Skip to question 32*

**Incidence data**

**26. Cases of Salmonella Enteritidis**

Number cultured from normally sterile sites

---

*Skip to question 32*

**Incidence data**

**27. Cases of Salmonella Heidelberg**

Number cultured from normally sterile sites

---

*Skip to question 32*

**Incidence data**

**28. Cases of Salmonella Dublin**

Number cultured from normally sterile sites

---

*Skip to question 32*

**Incidence data**

**29. Cases of Salmonella Newport**

Number cultured from normally sterile sites

---

*Skip to question 32*

**Incidence data**

**30. Cases of Salmonella Choleraesuis**

Number cultured from normally sterile sites

---

*Skip to question 32*

**Incidence data**

**31. Cases of other non-typhoidal Salmonella**

Specify serovar and number cultured from normally sterile sites

---

*Skip to question 32***Age-stratified incidence data****32. Is age stratified incidence provided?***Mark only one oval.* Yes *Skip to question 33* No *Skip to question 34**Skip to question 34***Age-stratified incidence data****33. Age stratified incidence**

Age group and incidence

---

---

---

---

---

**Adjusted incidence data****34. Is adjusted incidence provided?***Mark only one oval.* Yes *Skip to question 35* No *Skip to question 37**Skip to question 37***Adjusted incidence data**



### 35. Type of multipliers

*Check all that apply.*

- Healthcare utilization: eligible participants not seeking care at facility
- Enrollment: eligible participants did not have a blood culture collected
- Test sensitivity: adjustment for culture
- Seasonality
- None provided

Other:  \_\_\_\_\_

### 36. Adjusted incidence

incidence (cases/population/time; 10/100,000/year)

---

---

---

---

---

*Skip to question 37*

### Scan of reference list

### 37. List of references needing check

Based on context in which citation was used and the title of article

---

---

---

---

---

### Notes

38. Notes on the article, if necessary

---

---

---

---

---

---

This content is neither created nor endorsed by Google.

Google Forms
